# Supplementary material
Source: ML conference proceedings conference paper supplement (https://openreview.net/forum?id=5ep85sakT3)

# Plants

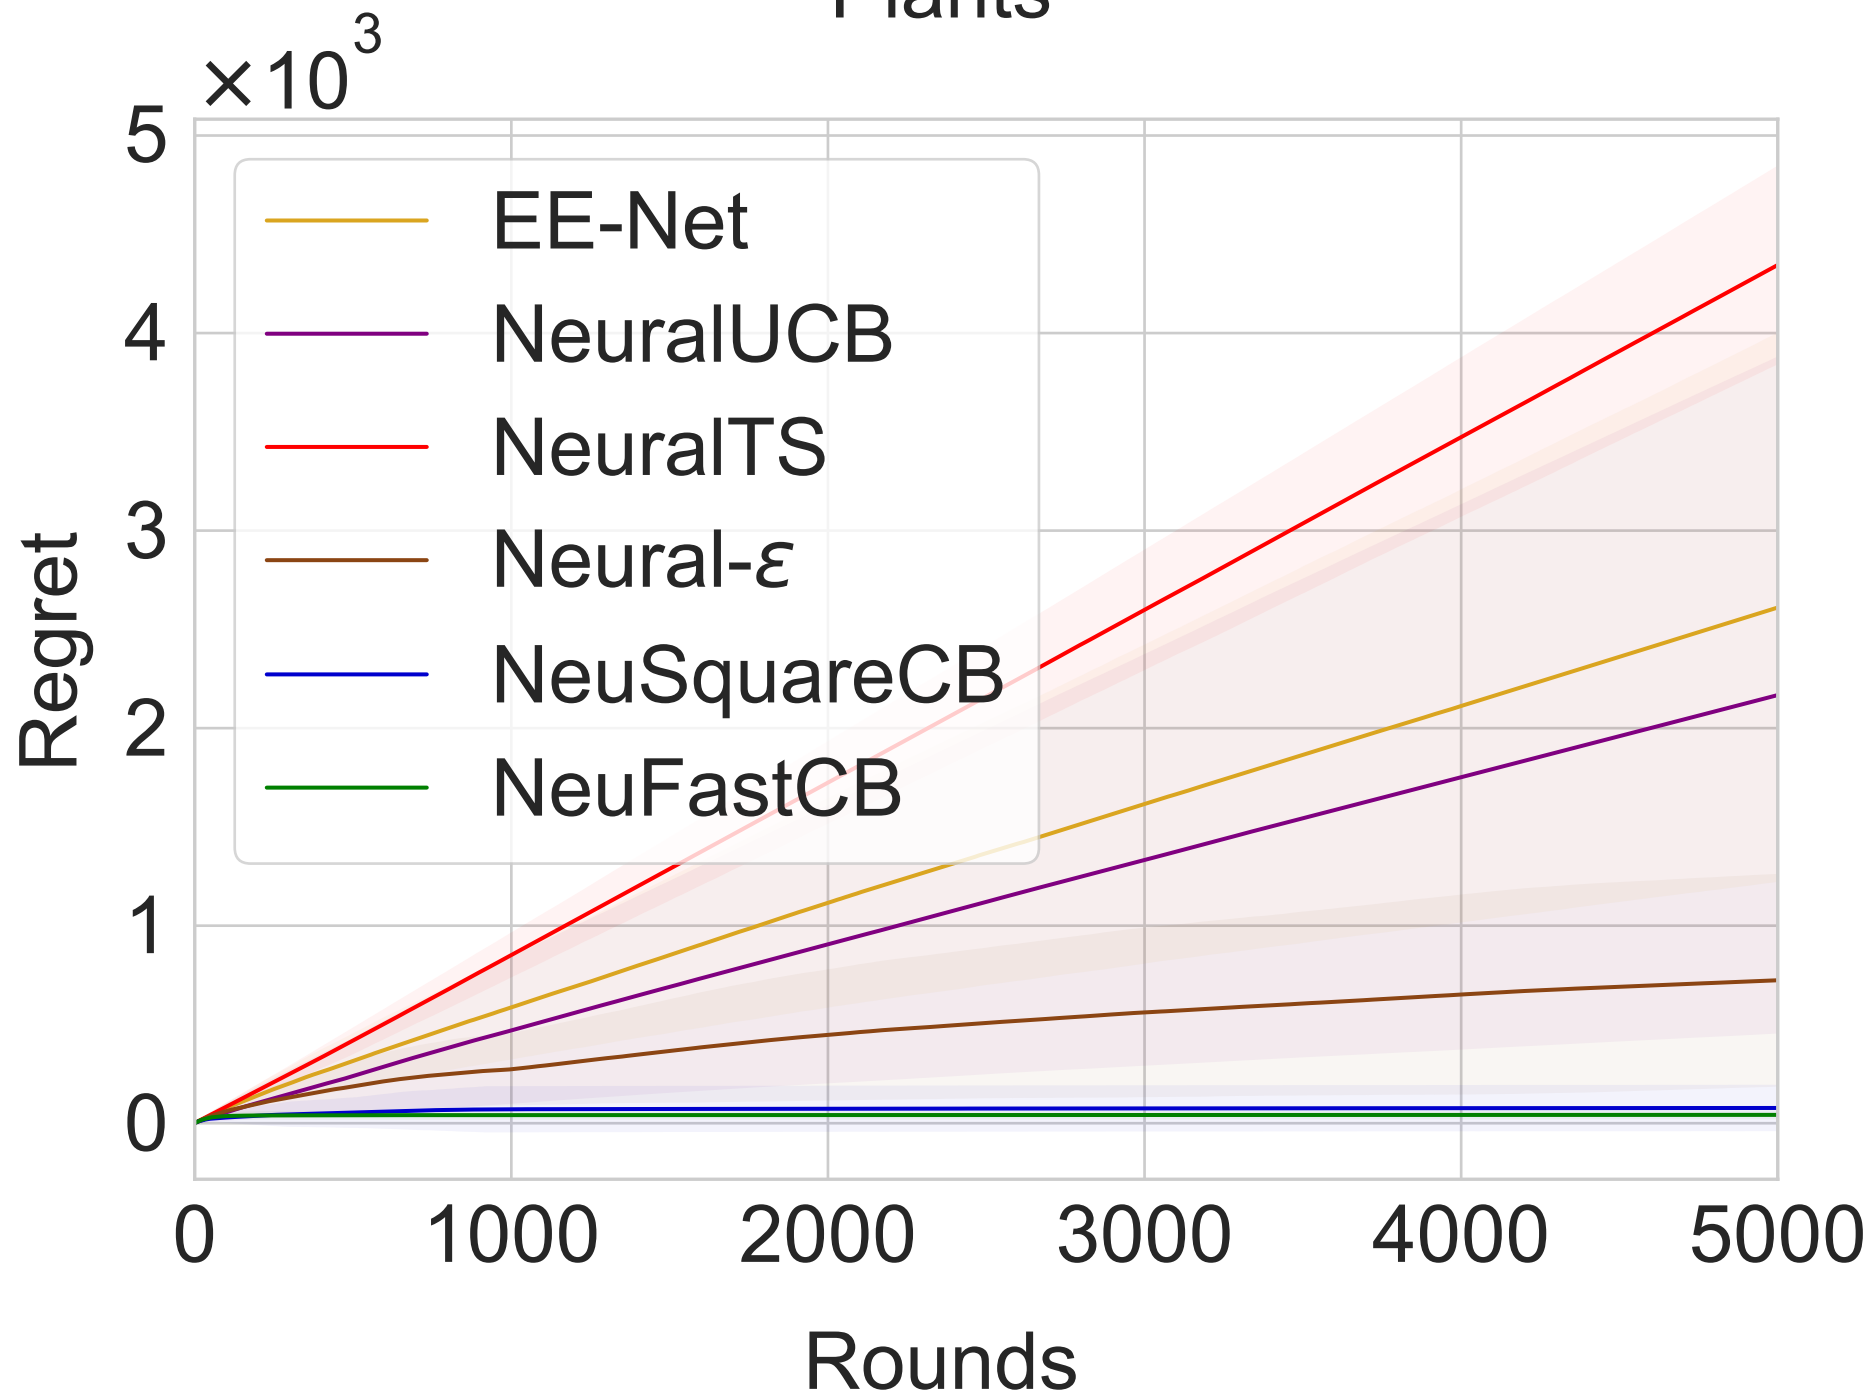

Supplement: supplementary_material [file attachment]

shuttle

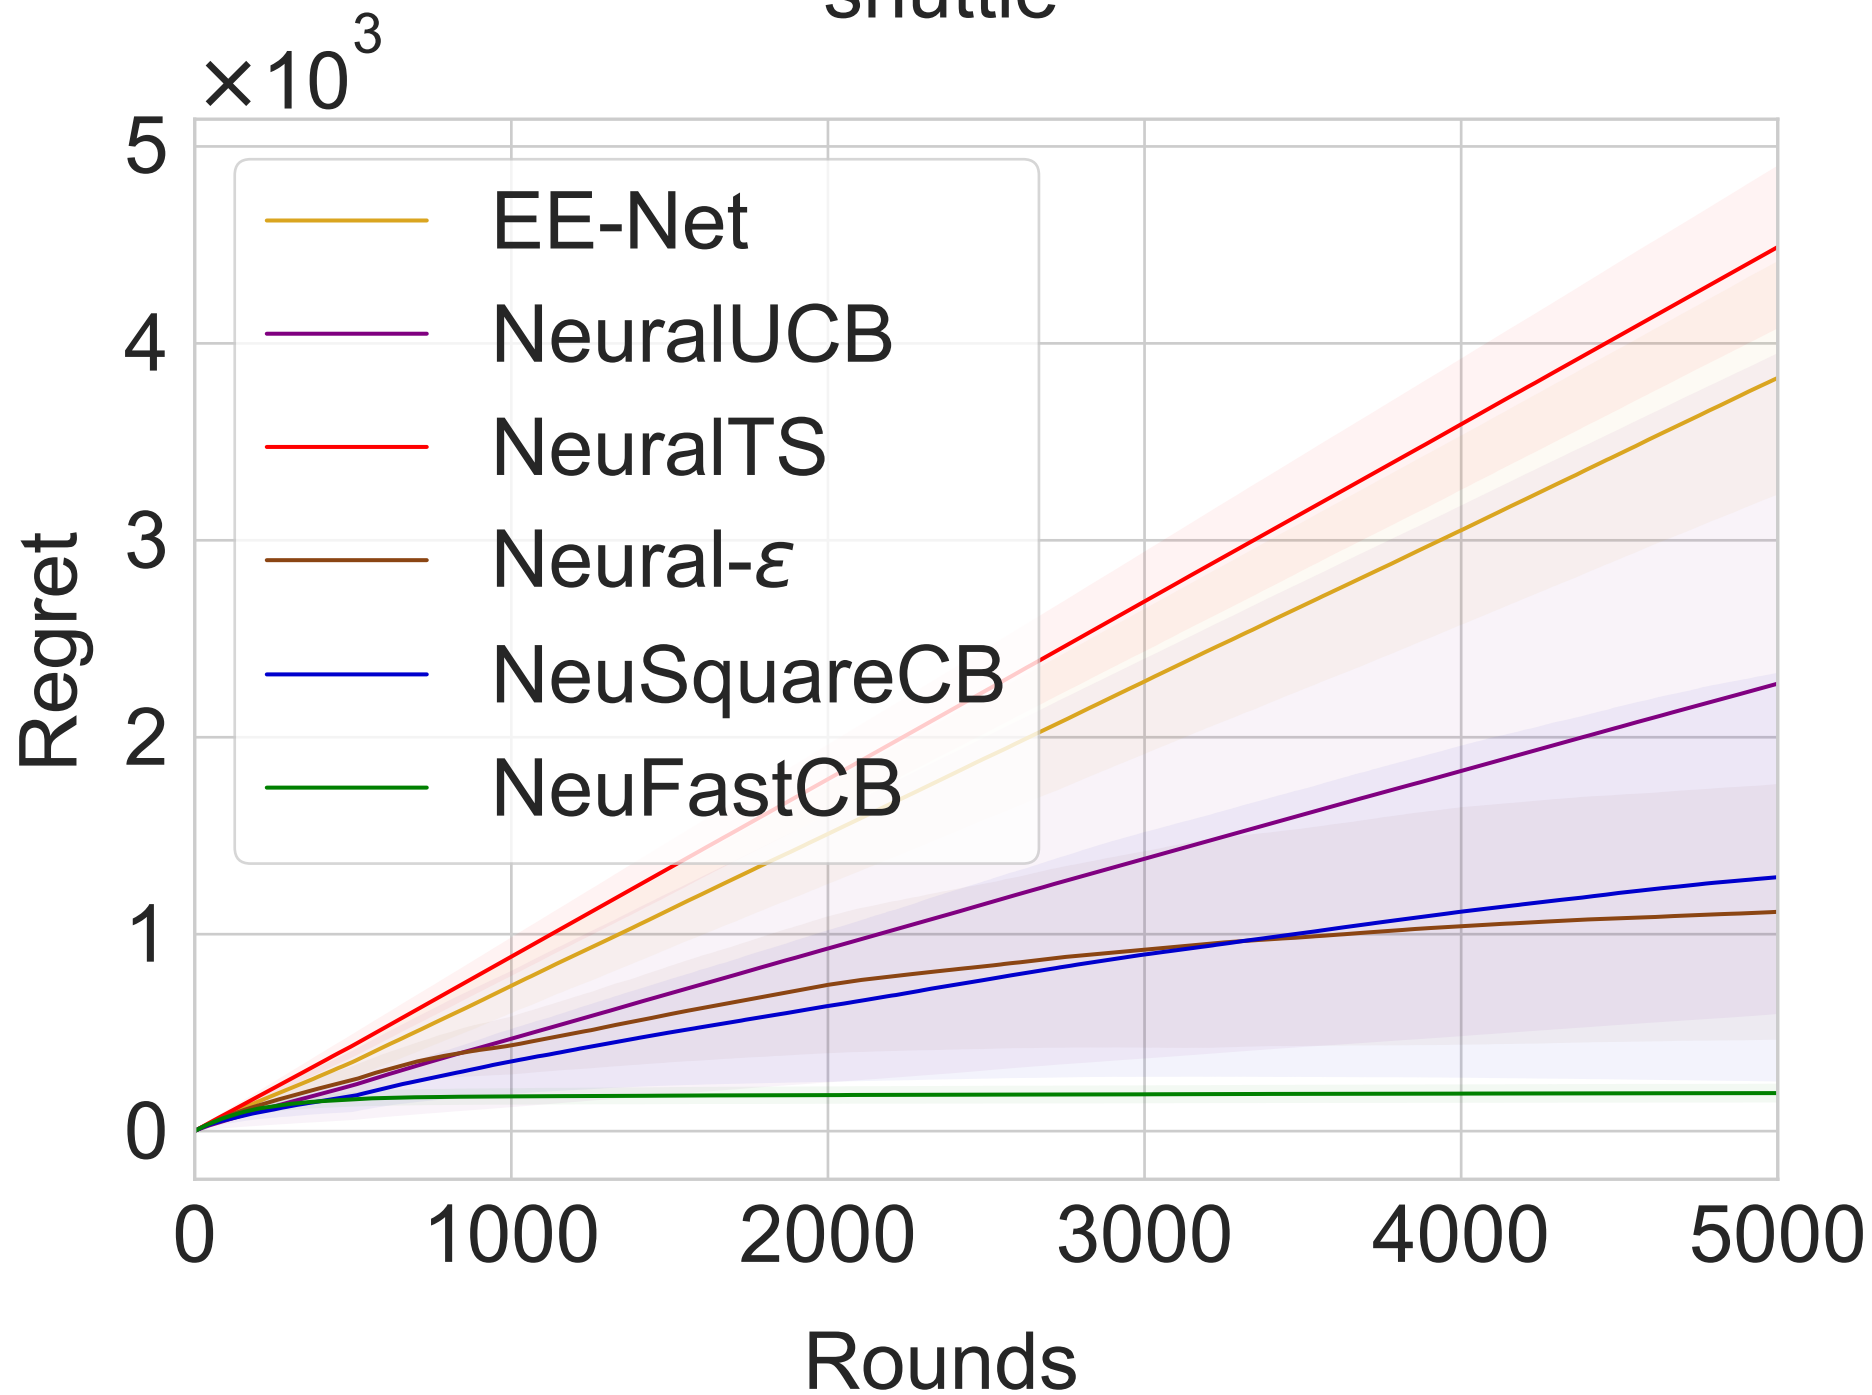

Supplement: supplementary_material [file attachment]

# mushroom

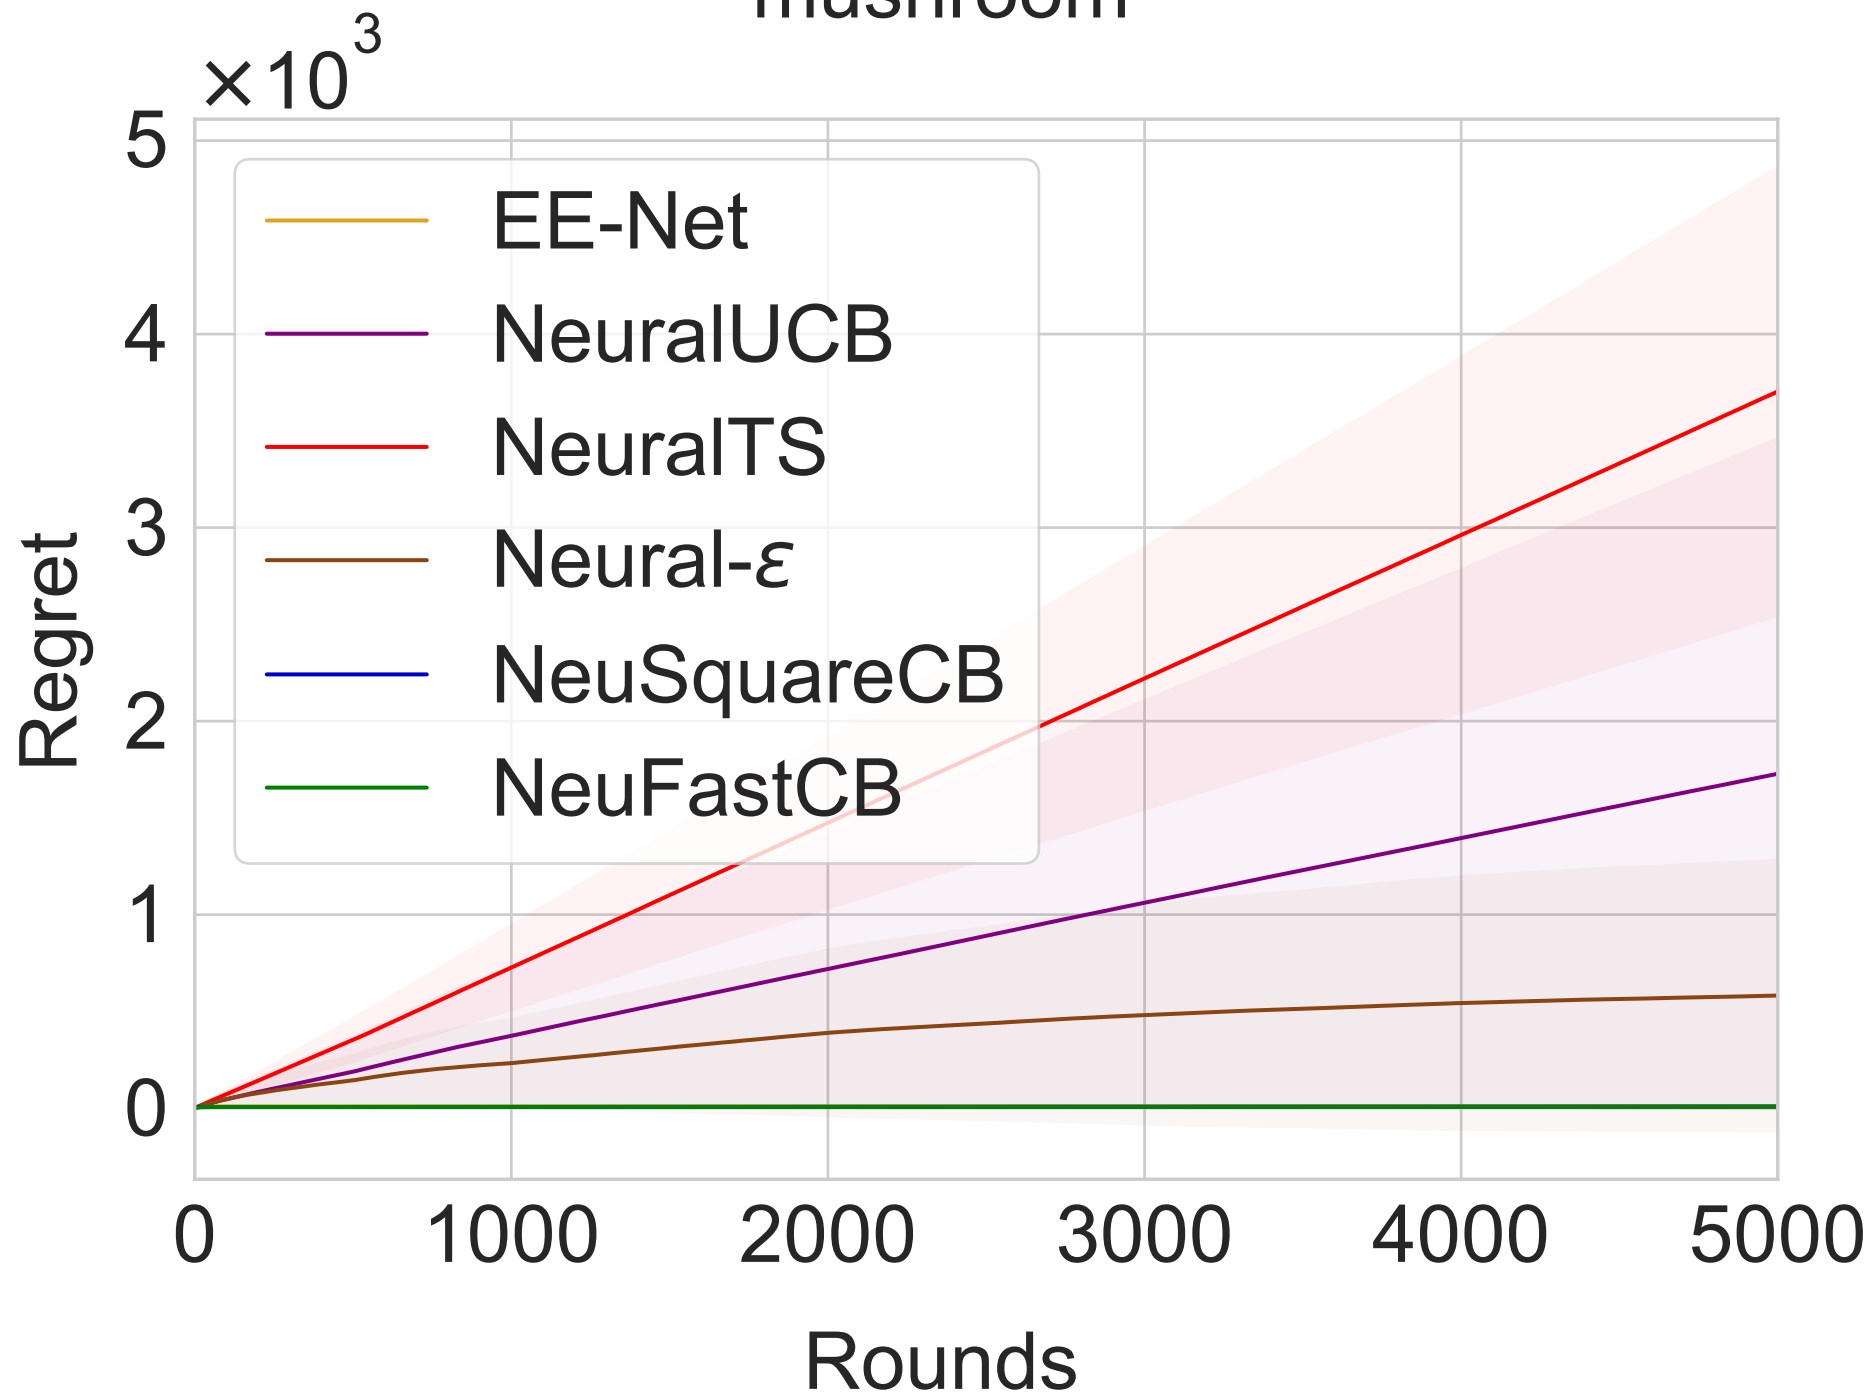

Supplement: supplementary_material [file attachment]

covertime

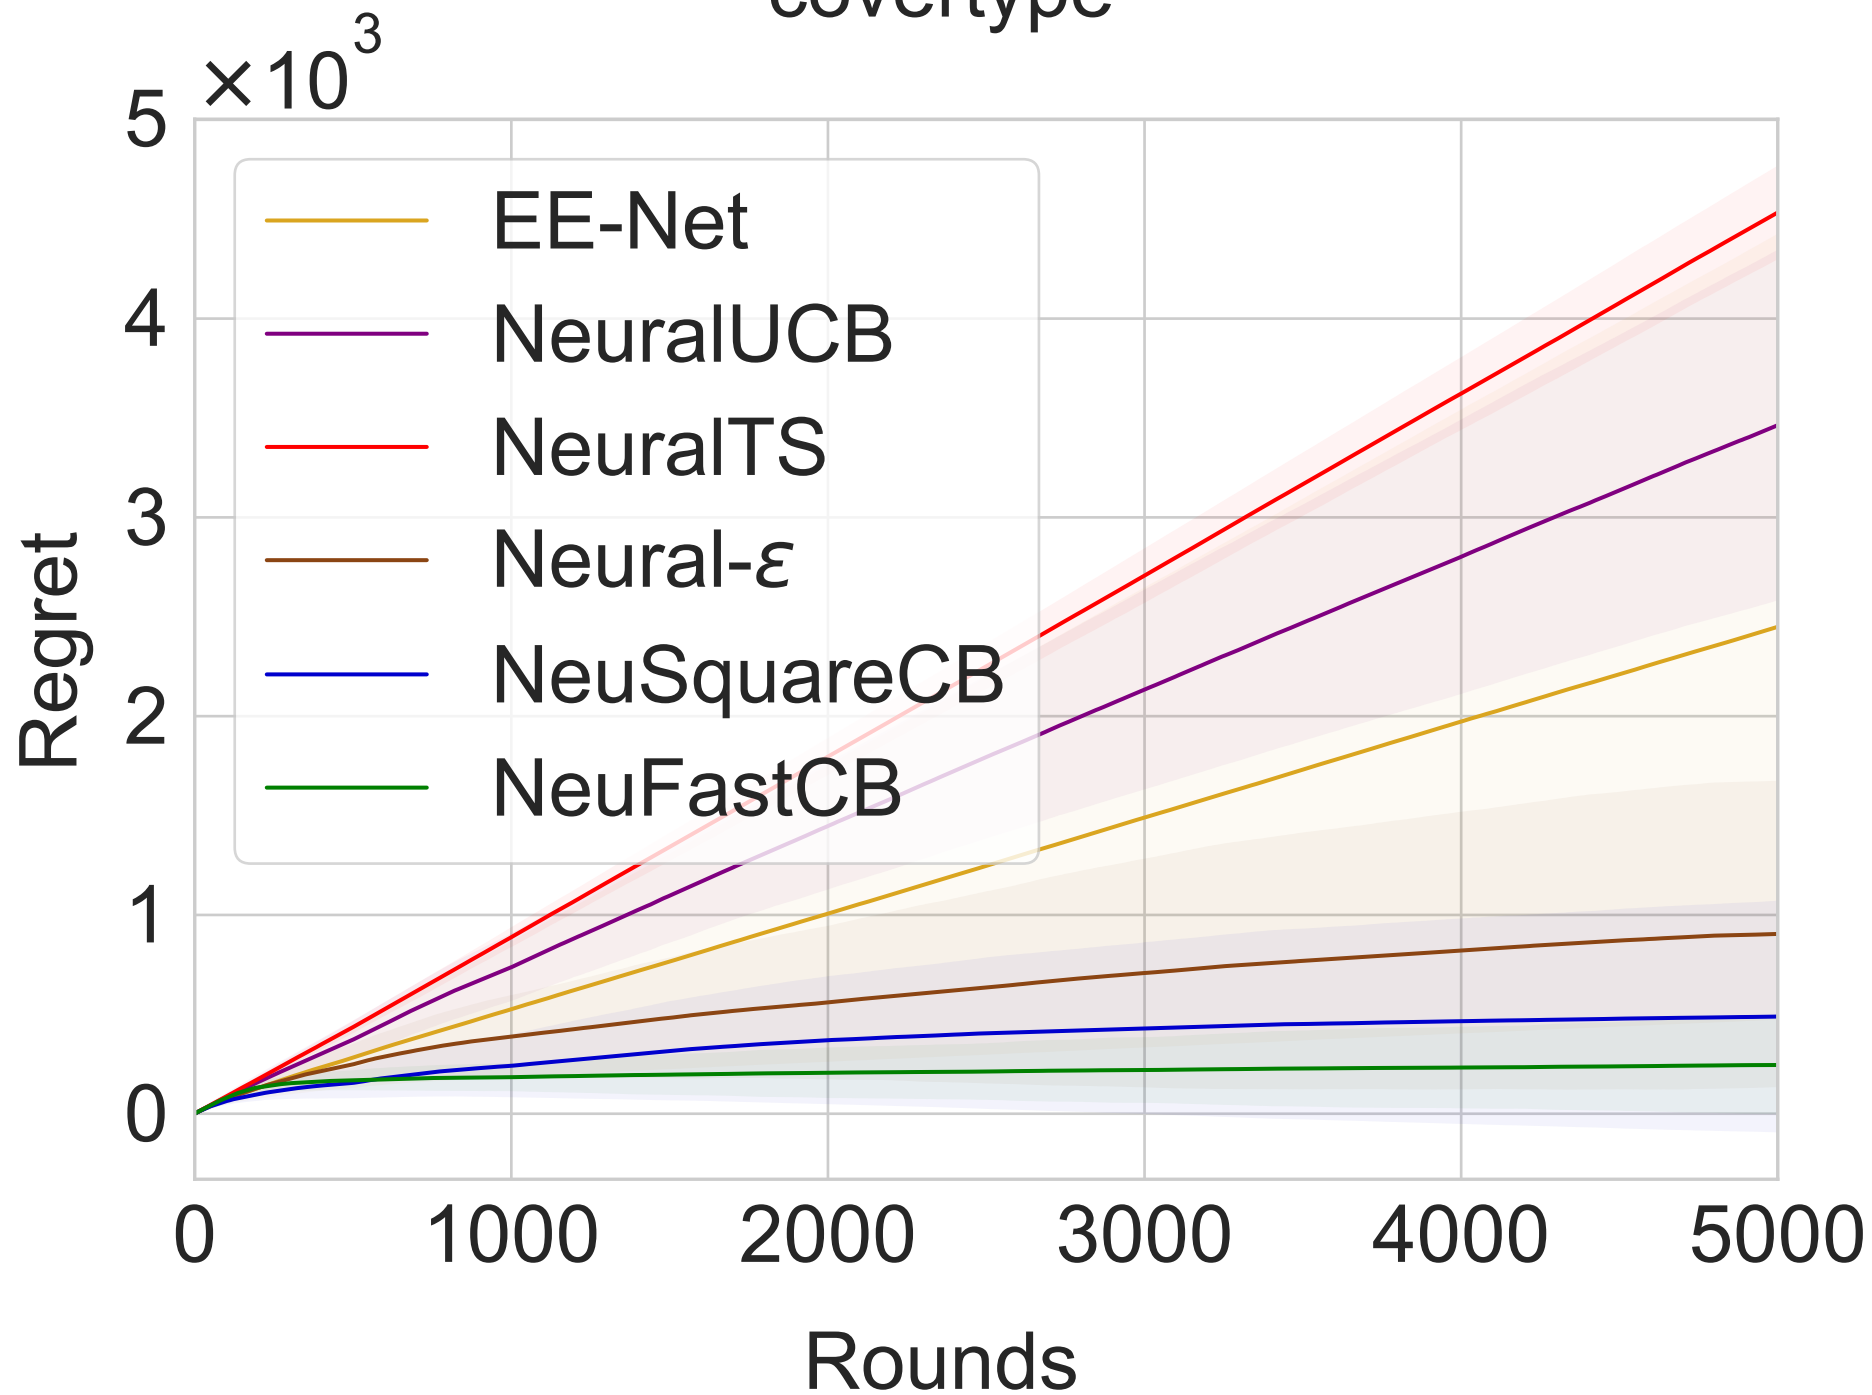

Supplement: supplementary_material [file attachment]

fashion

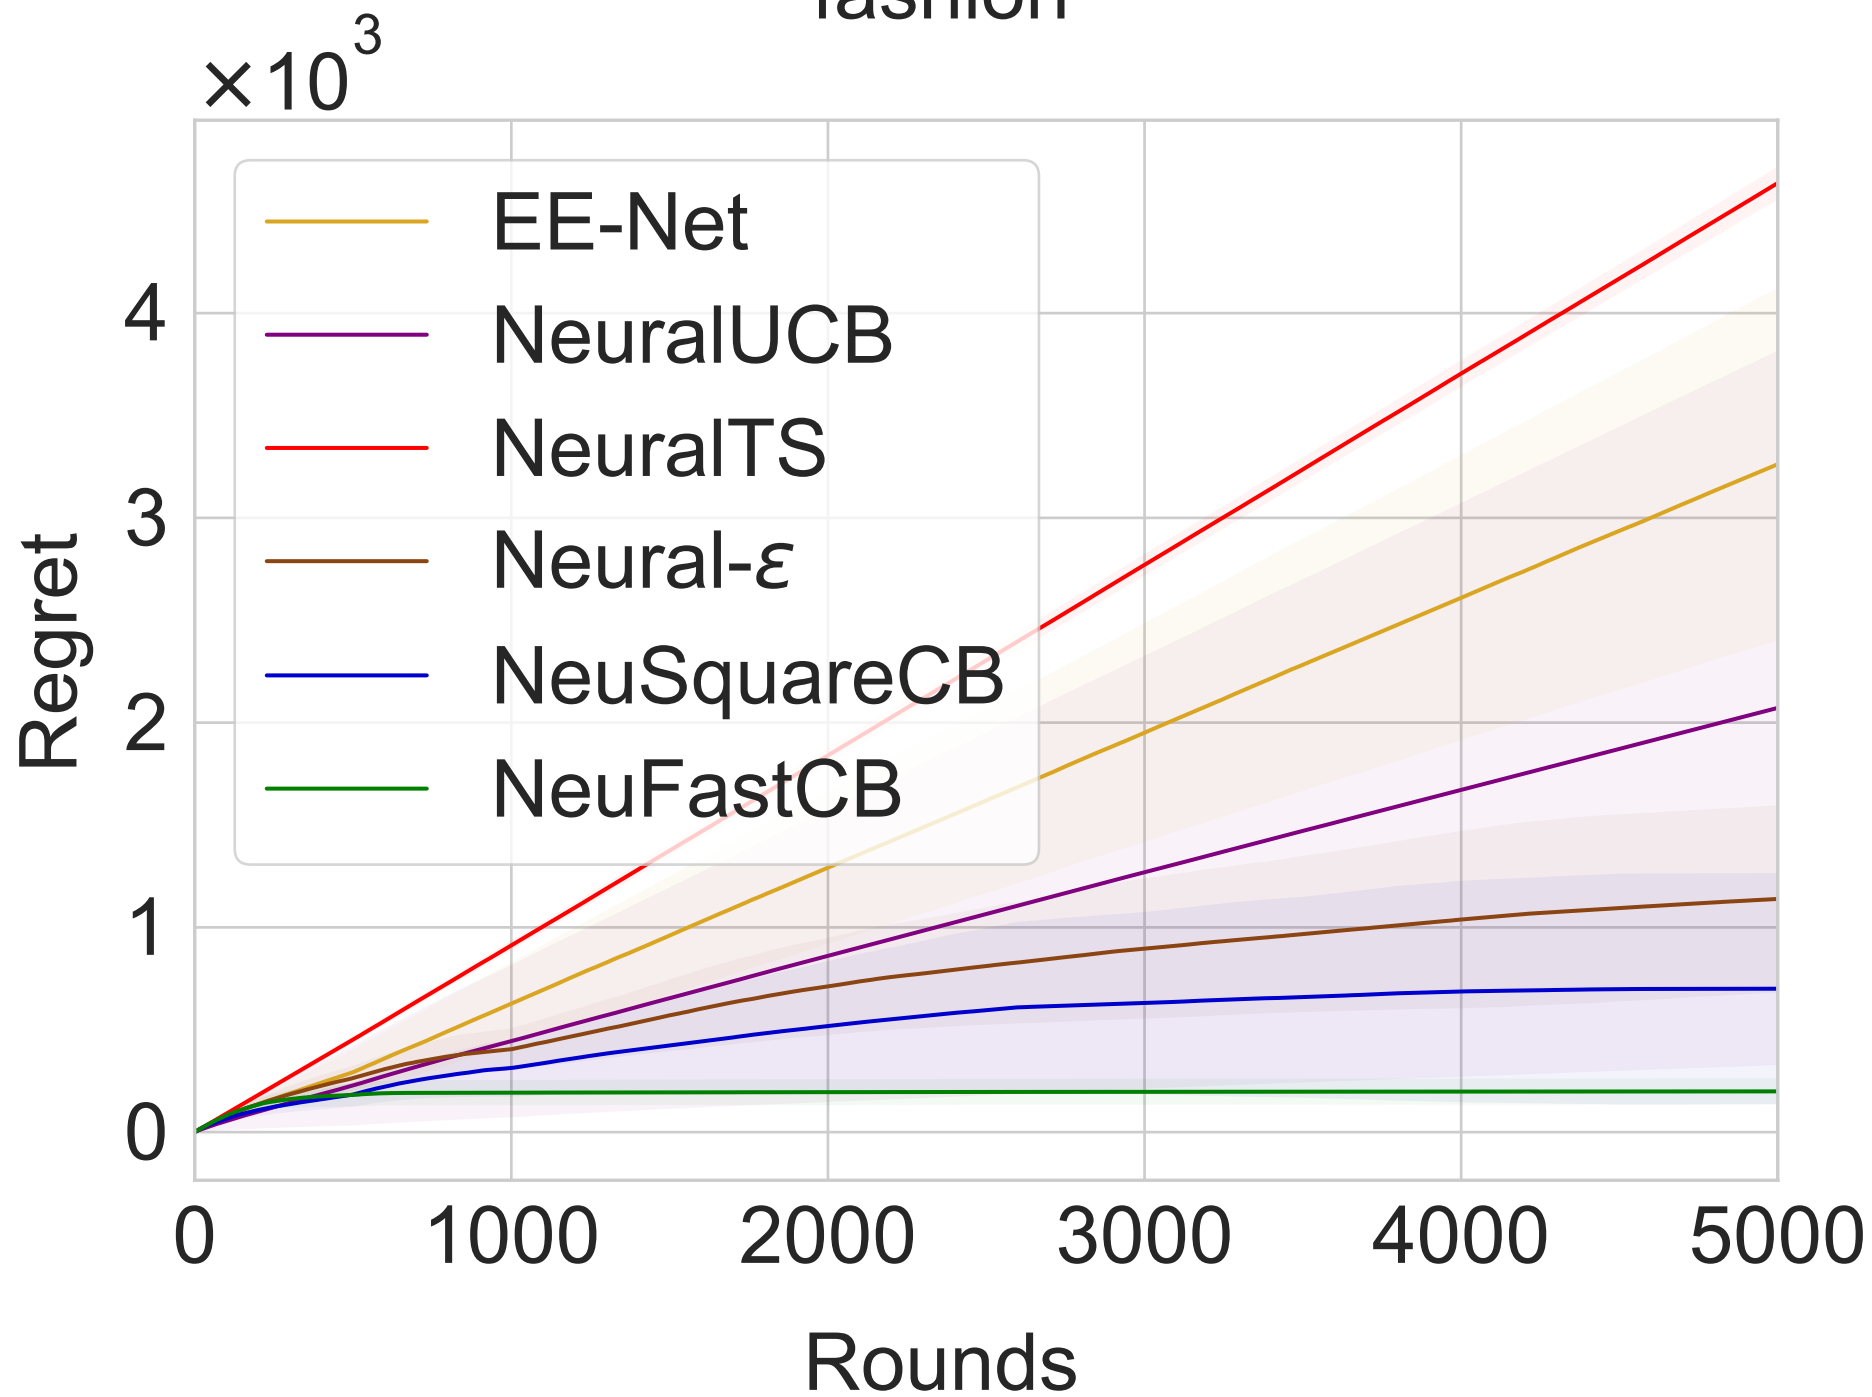

Supplement: supplementary_material [file attachment]

# MagicTelescope

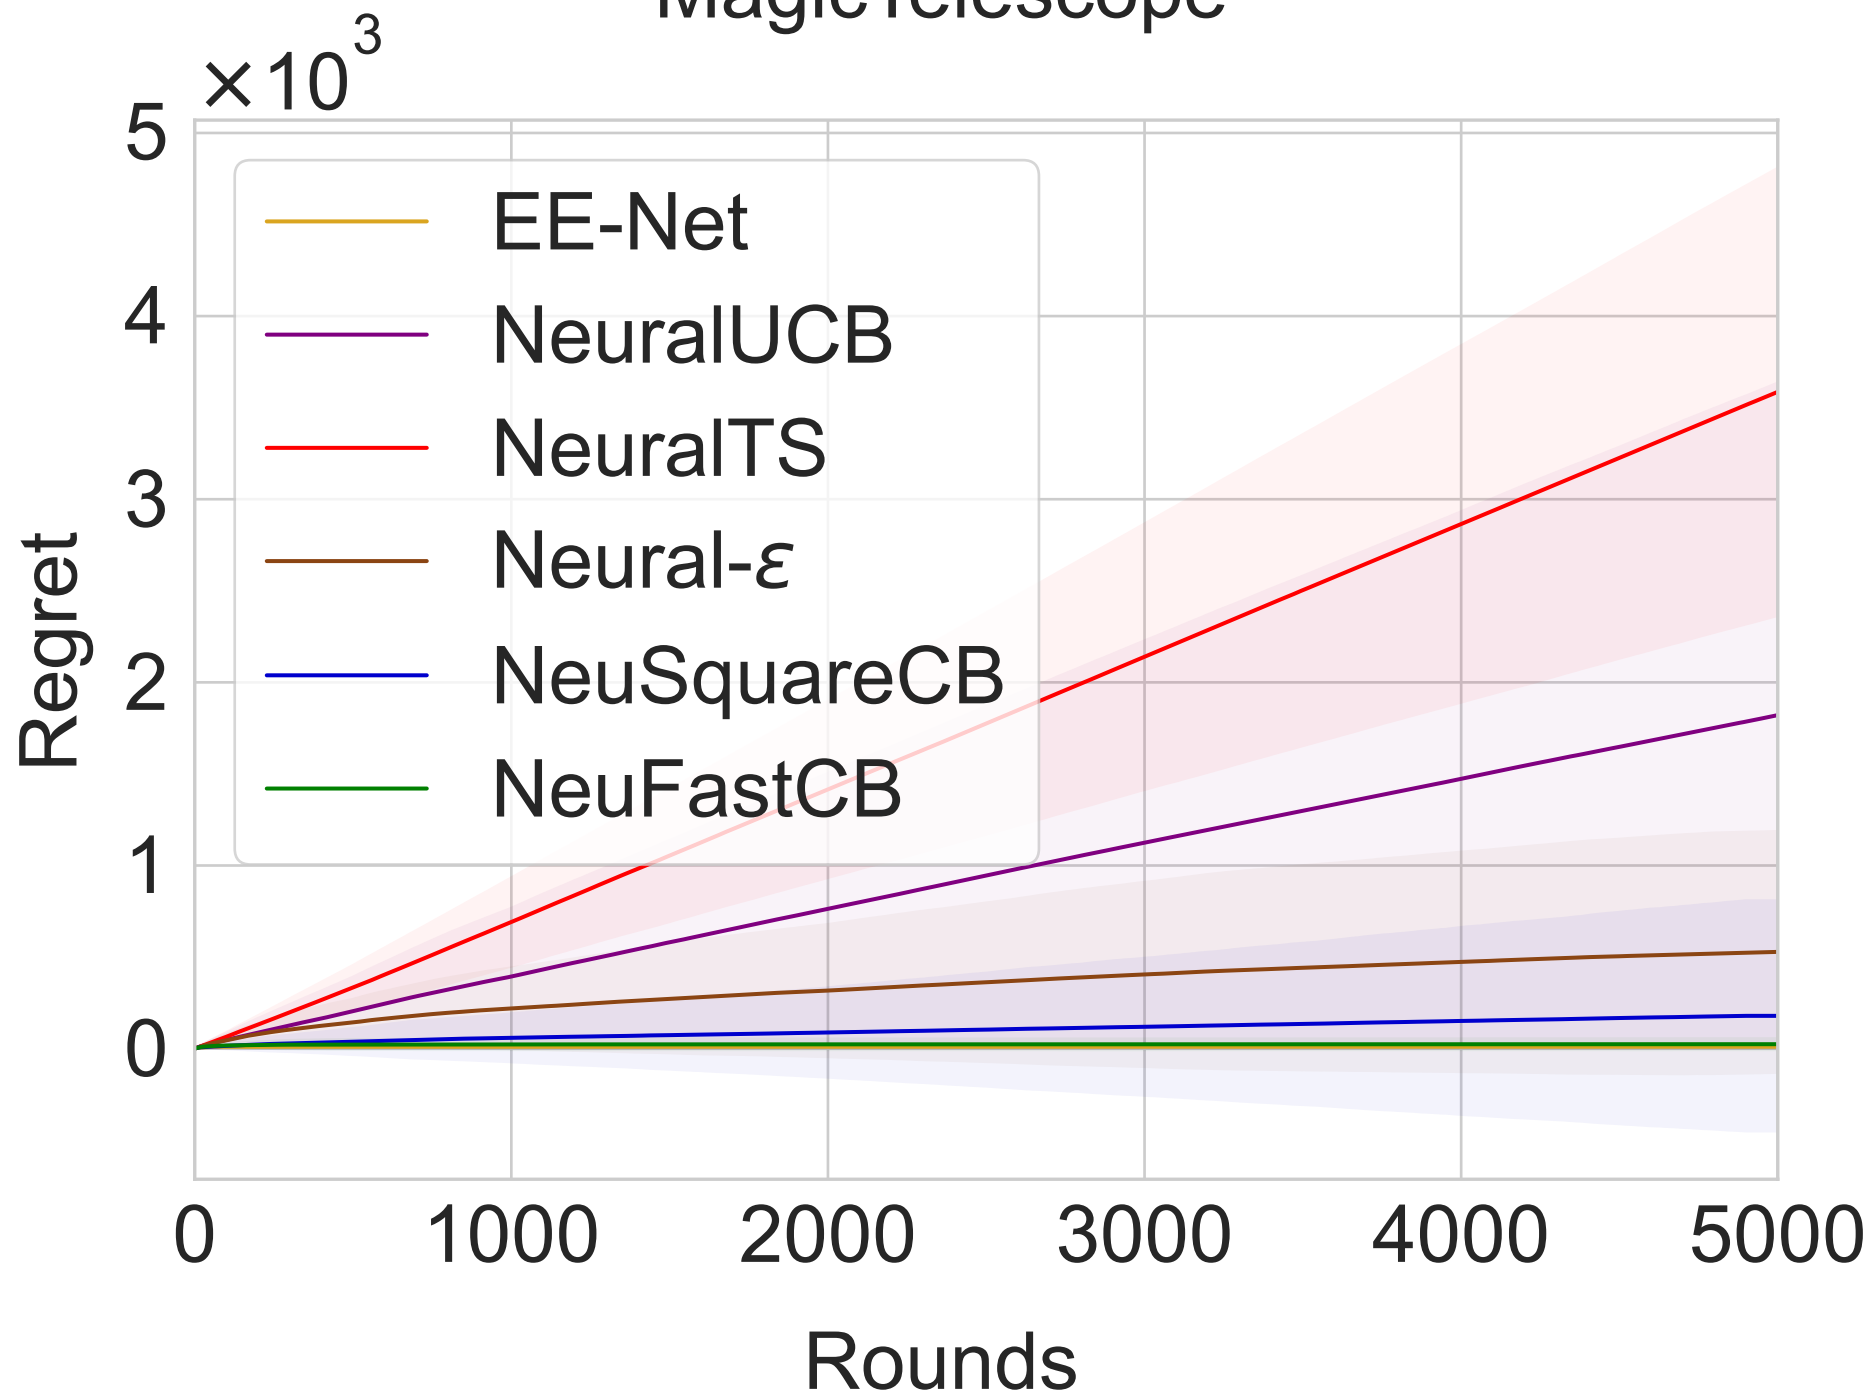

Supplement: supplementary_material [file attachment]
